# Supplementary material for: Bi-functional RuO2–Co3O4 core–shell nanofibers as a multi-component one-dimensional water oxidation catalyst
Source: Royal Society of Chemistry journal article supplement (doi:10.1039/c3cc44564j), 2013-01-01
Supplement: c3cc44564j.pdf [file c3cc44564j.pdf]

Supporting Information

**Bi-functional RuO<sub>2</sub>/Co<sub>3</sub>O<sub>4</sub> Core/Shell Nanofibers as a Multi-component One-Dimensional Water Oxidation Catalyst**

*Jong Wan Ko, Won-Hee Ryu, Il-Doo Kim\*, Chan Beum Park\**

**Experimental Details**

*Materials:* Cobalt (II) acetate tetrahydrate [CH<sub>3</sub>(COO)<sub>2</sub>Co·4H<sub>2</sub>O], ruthenium (III) chloride (RuCl<sub>3</sub>), polyvinylpyrrolidone (PVP, Mw = 1,300,000), N,N-dimethylformamide, sodium tetraborate decahydrate (Na<sub>2</sub>B<sub>4</sub>O<sub>7</sub>·10H<sub>2</sub>O), tris (2,2'-bipyridyl) dichlororuthenium(II) hexahydrate ([Ru(bpy)<sub>3</sub>]Cl<sub>2</sub>·6H<sub>2</sub>O), Co<sub>3</sub>O<sub>4</sub> (particle size <50 nm), and sodium persulfate (Na<sub>2</sub>S<sub>2</sub>O<sub>8</sub>) were purchased from Sigma-Aldrich (St. Louis, USA) and all chemicals were used without further purification.

*Synthesis of Co<sub>3</sub>O<sub>4</sub>, RuO<sub>2</sub> and RuO<sub>2</sub>/Co<sub>3</sub>O<sub>4</sub> NFs:* To prepare the metal precursor solution, (CH<sub>3</sub>COO)<sub>2</sub>Co·4H<sub>2</sub>O and RuCl<sub>3</sub> with a different atomic ratio of Ru/Co (total precursor weight of 3 g) were dissolved in 7.5 g of N,N-dimethylformamide and continuously stirred at room temperature for 1 h. Then, 1 g of PVP was dissolved and stirred in the precursor solution for 6 h. For the RuO<sub>2</sub>/Co<sub>3</sub>O<sub>4</sub> NFs, the value 8 : 2 was selected as the ratio of Ru : Co. A feeding rate was controlled at 0.5 mL h<sup>-1</sup> during electrospinning and a stainless steel foil as a collector was vertically positioned 15 cm away from the syringe needle (25 gauge) under a constant potential of 20 kV to collect as-spun sole Co or sole Ru or Ru/Co precursor/PVP NFs. The obtained as-spun NFs were calcined at 600 °C for 1 h in air atmosphere.

*Characterization of synthesized Co<sub>3</sub>O<sub>4</sub>, RuO<sub>2</sub> and RuO<sub>2</sub>/Co<sub>3</sub>O<sub>4</sub> NFs:* The morphologies of the prepared samples were observed using an XL30SFEG scanning electron microscopy (PHILIPS, USA) and a Tecnai F30 S-Twin transmission electron microscope (FEI Company,

USA). The element distribution was investigated using EDS mapping. The crystalline phase of the samples was analyzed using a D/MAX-RC X-ray diffractometer (RIGAKU Co., Japan) and a MultiLab 2000 X-ray photoelectron spectroscopy (Thermo scientific, UK). The surface area of the samples were measured using Brunauer-Emmett-Teller (BET) method with a Tristar II 3020 surface area analyzer (Micromeritics, USA).

*Catalytic oxygen evolution:* Photochemical water oxidation experiments were conducted in 60 mL vials containing 20 mL of sodium borate buffer (80 mM, pH 8.0) with 24 mg  $\text{Na}_2\text{S}_2\text{O}_8$ , 15 mg  $[\text{Ru}(\text{bpy})_3]\text{Cl}_2 \cdot 6\text{H}_2\text{O}$ , and 20 mg of  $\text{Co}_3\text{O}_4$  nanoparticles,  $\text{Co}_3\text{O}_4$ ,  $\text{RuO}_2$ , and  $\text{RuO}_2/\text{Co}_3\text{O}_4$  NFs. Photochemical oxygen evolution was continuously monitored using a custom-made oxygen analysis system. The reaction solution was irradiated using a xenon lamp (450 W) with a 420 nm cut-off filter and purged with  $\text{N}_2$  (99.999%) gas as a carrier gas. The oxygen concentration of the carrier gas was monitored using a series 3500 Trace Oxygen Transmitter (Alpha Omega Instruments Co., USA).

*Electrochemical measurements:* Cyclic voltammetry (CV) was performed using a WMPG1000 potentiostat/galvanostat (WonATech, Korea) with  $\text{Co}_3\text{O}_4$ ,  $\text{RuO}_2$ , and  $\text{RuO}_2/\text{Co}_3\text{O}_4$  NFs-Nafion solution (1 mg in 200  $\mu\text{L}$ ) deposited on a glassy carbon electrode as a working electrode, a platinum wire as a counter electrode, and an  $\text{Ag}/\text{AgCl}$  reference electrode in a sodium borate buffer solution (80 mM, pH 8.0) at room temperature with a scan rate of 100  $\text{mV s}^{-1}$ .

*Catalytic activity measurements:* The catalytic activity of  $\text{Co}_3\text{O}_4$ ,  $\text{RuO}_2$ , and  $\text{RuO}_2/\text{Co}_3\text{O}_4$  NFs in photochemical water oxidation with  $\text{Ru}(\text{bpy})_3^{3+}$  was estimated by monitoring the decay of  $\text{Ru}(\text{bpy})_3^{3+}$ . A phosphate buffer solution (950  $\mu\text{L}$ , 100 mM, pH 5.6) containing  $\text{Na}_2\text{S}_2\text{O}_8$  (5 mM) and  $\text{Ru}(\text{bpy})_3^{2+}$  (1 mM) in a 1 mL quartz cuvette (with a path length of 1 cm) was irradiated by a xenon lamp to produce photo-induced  $\text{Ru}(\text{bpy})_3^{3+}$  for 15 seconds. To the prepared reaction solution, 50  $\mu\text{L}$  of phosphate buffer solution (100 mM, pH 5.6) containing

1     $\text{Co}_3\text{O}_4$ ,  $\text{RuO}_2$ , and  $\text{RuO}_2/\text{Co}_3\text{O}_4$  NFs (1 mg in 10 mL) was added. Then, the decrease in UV  
2    absorbance intensity of the reaction solution at 670 nm attributable to  $\text{Ru}(\text{bpy})_3^{3+}$  was  
3    monitored during catalytic water oxidation by  $\text{Co}_3\text{O}_4$ ,  $\text{RuO}_2$ , and  $\text{RuO}_2/\text{Co}_3\text{O}_4$  NFs using a  
4    UV-visible spectrophotometer (Jasco Inc., Japan) in the time course mode.  
5

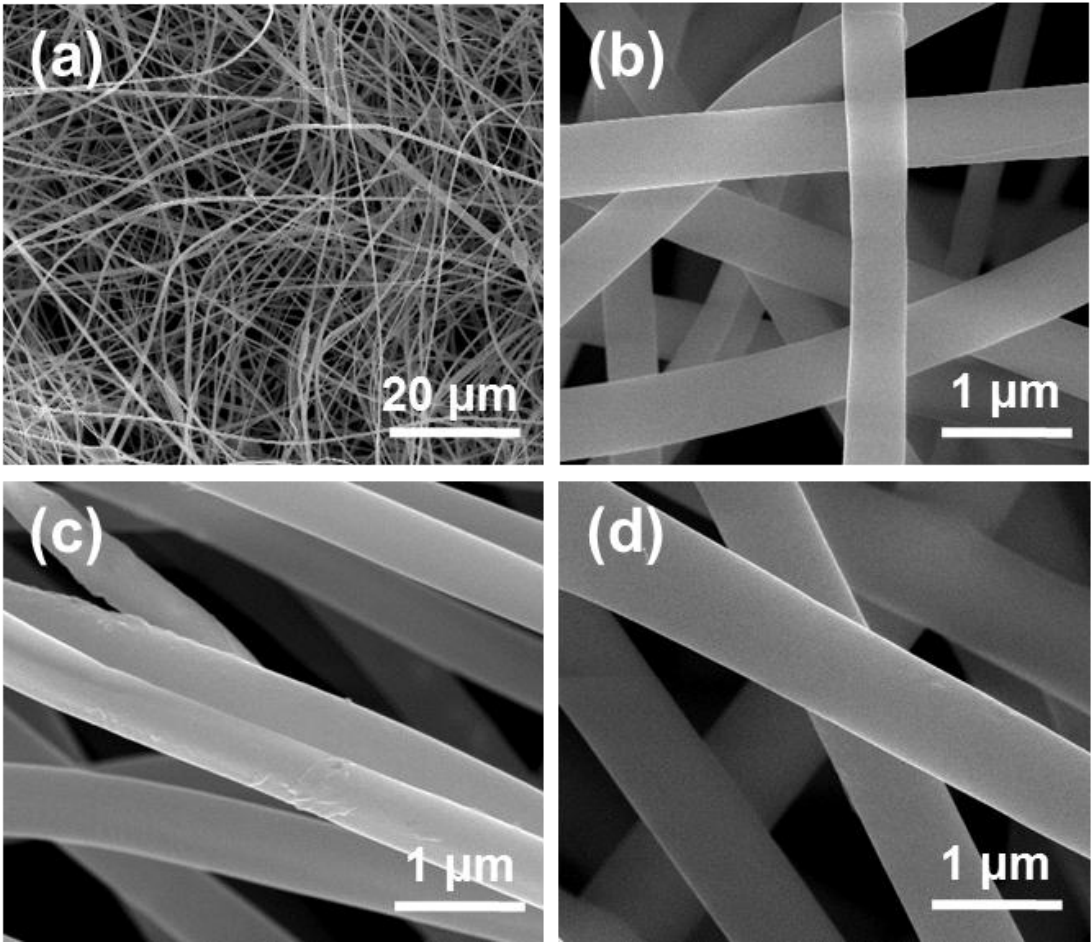

**Fig. S1** SEM images of (a, b) the as-spun NFs of Co precursor with PVP, (c) the as-spun NFs of Ru precursor with PVP, and (d) the as-spun NFs of Ru/Co (2 : 8) precursor with PVP prepared by electrospinning.

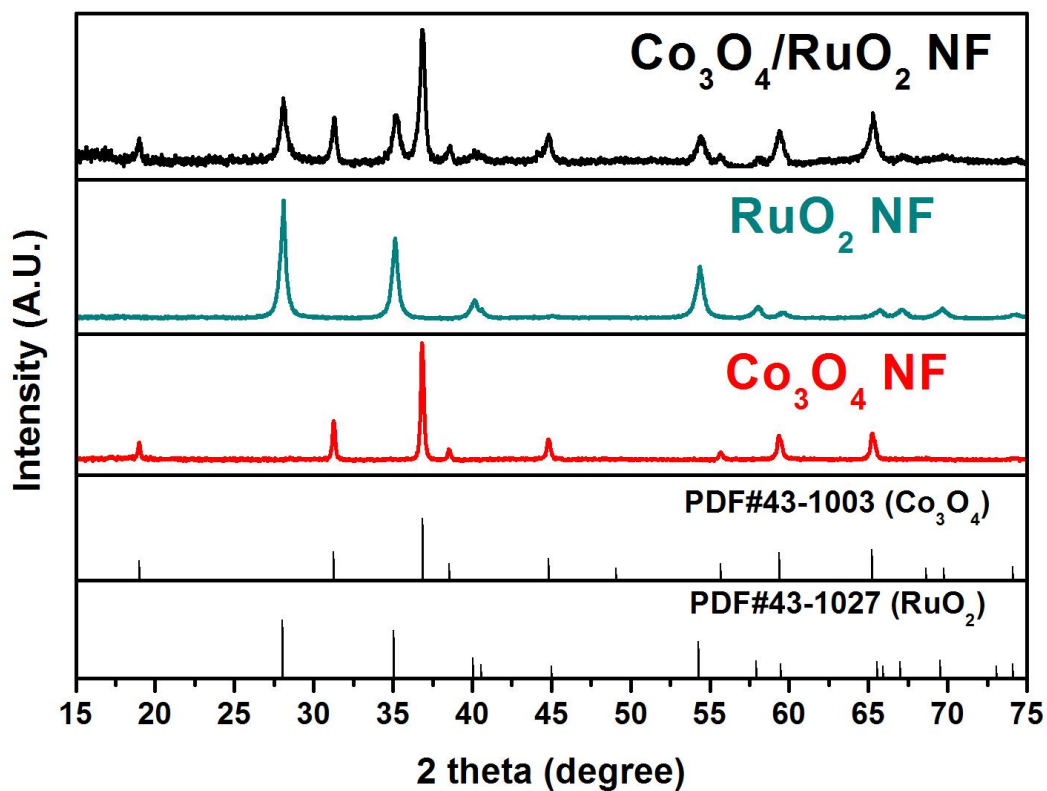

**Fig. S2** X-ray diffraction patterns of electrospun  $\text{Co}_3\text{O}_4$ ,  $\text{RuO}_2$  and  $\text{RuO}_2/\text{Co}_3\text{O}_4$  NFs calcined at 600 °C for 1 h. For reference, standard X-ray diffraction data (JCPDS) of  $\text{Co}_3\text{O}_4$  and  $\text{RuO}_2$  were also indexed.

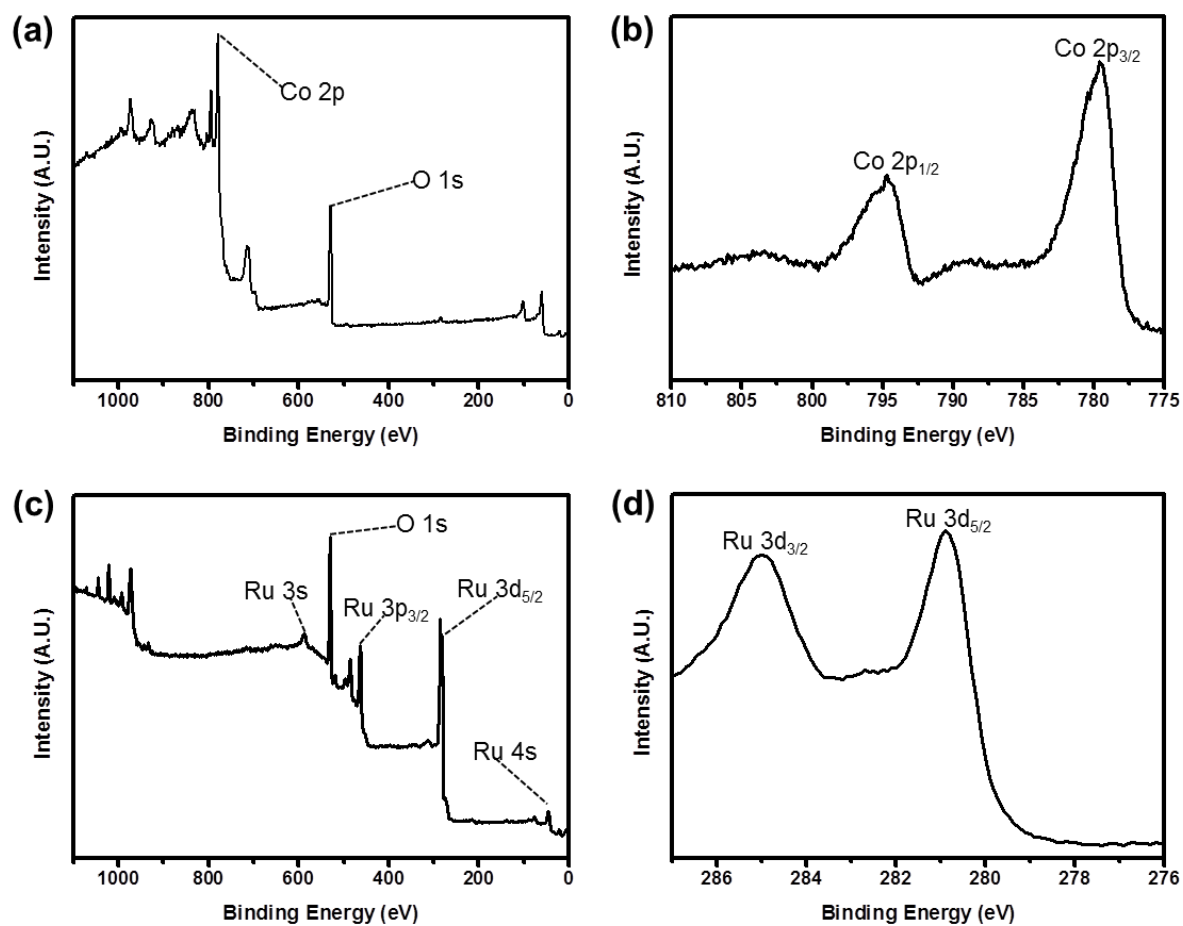

**Fig. S3** XPS spectra of Co<sub>3</sub>O<sub>4</sub> NFs in the wide range from 0 to 1250 eV. (a) the XPS scan of Co<sub>3</sub>O<sub>4</sub> NFs indicating two compositional elements (i.e., Co, and O); (b) the XPS spectra of Co<sub>3</sub>O<sub>4</sub> NFs in magnified scale exhibiting Co 2p<sub>1/2</sub> and Co 2p<sub>3/2</sub> peaks; (c) the XPS scan of RuO<sub>2</sub> NFs showing Ru and O elements; and (d) Ru 3d spectrum of RuO<sub>2</sub> NF confirming the existence of Ru<sup>4+</sup> ions in the synthesized NF.

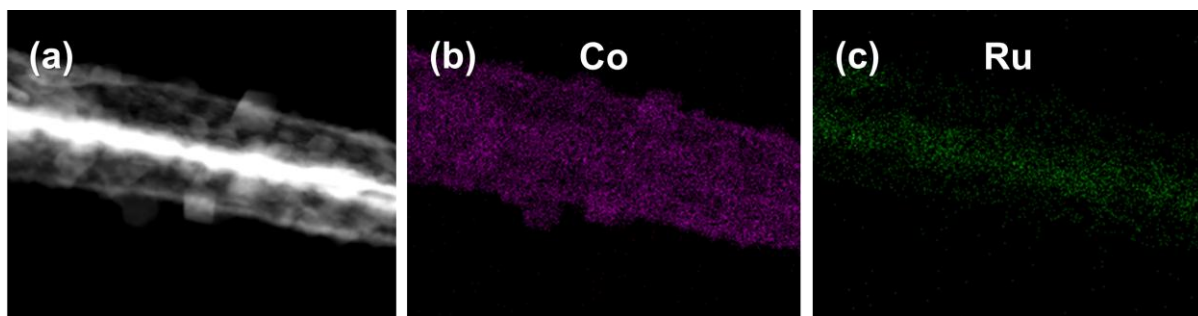

**Fig. S4** STEM image of the  $\text{RuO}_2/\text{Co}_3\text{O}_4$  NF; element map of (a) as-synthesized NF (b) purple (cobalt); and (c) green (ruthenium)

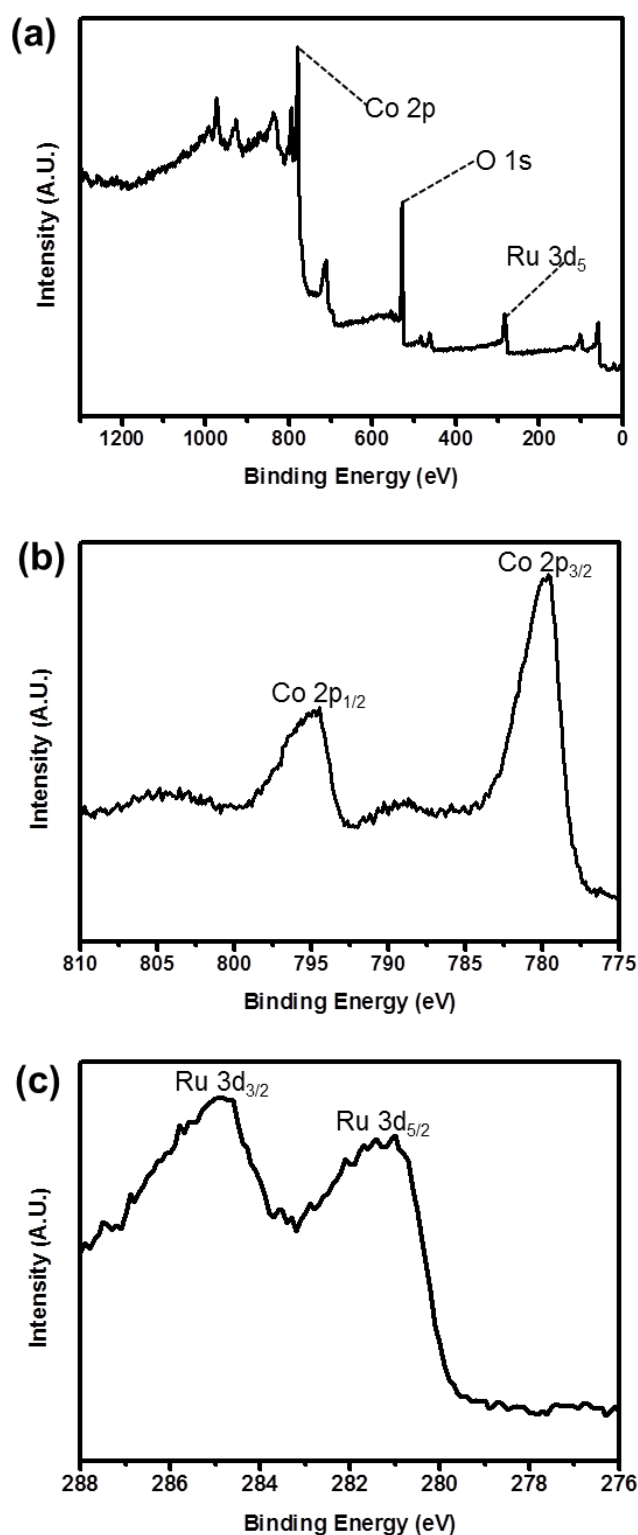

**Fig. S5** (a) The XPS scan of RuO<sub>2</sub>/Co<sub>3</sub>O<sub>4</sub> NFs indicating three compositional elements (i.e., Co, Ru, and O) in the wide range from 0 to 1250 eV; (b) the XPS spectra of RuO<sub>2</sub>/Co<sub>3</sub>O<sub>4</sub> at a magnified scale exhibiting Co 2p<sub>1/2</sub> and Co 2p<sub>3/2</sub> peaks; and (c) the Ru 3p spectrum of RuO<sub>2</sub>/Co<sub>3</sub>O<sub>4</sub> confirming the existence of Ru<sup>4+</sup> ions in the composite.

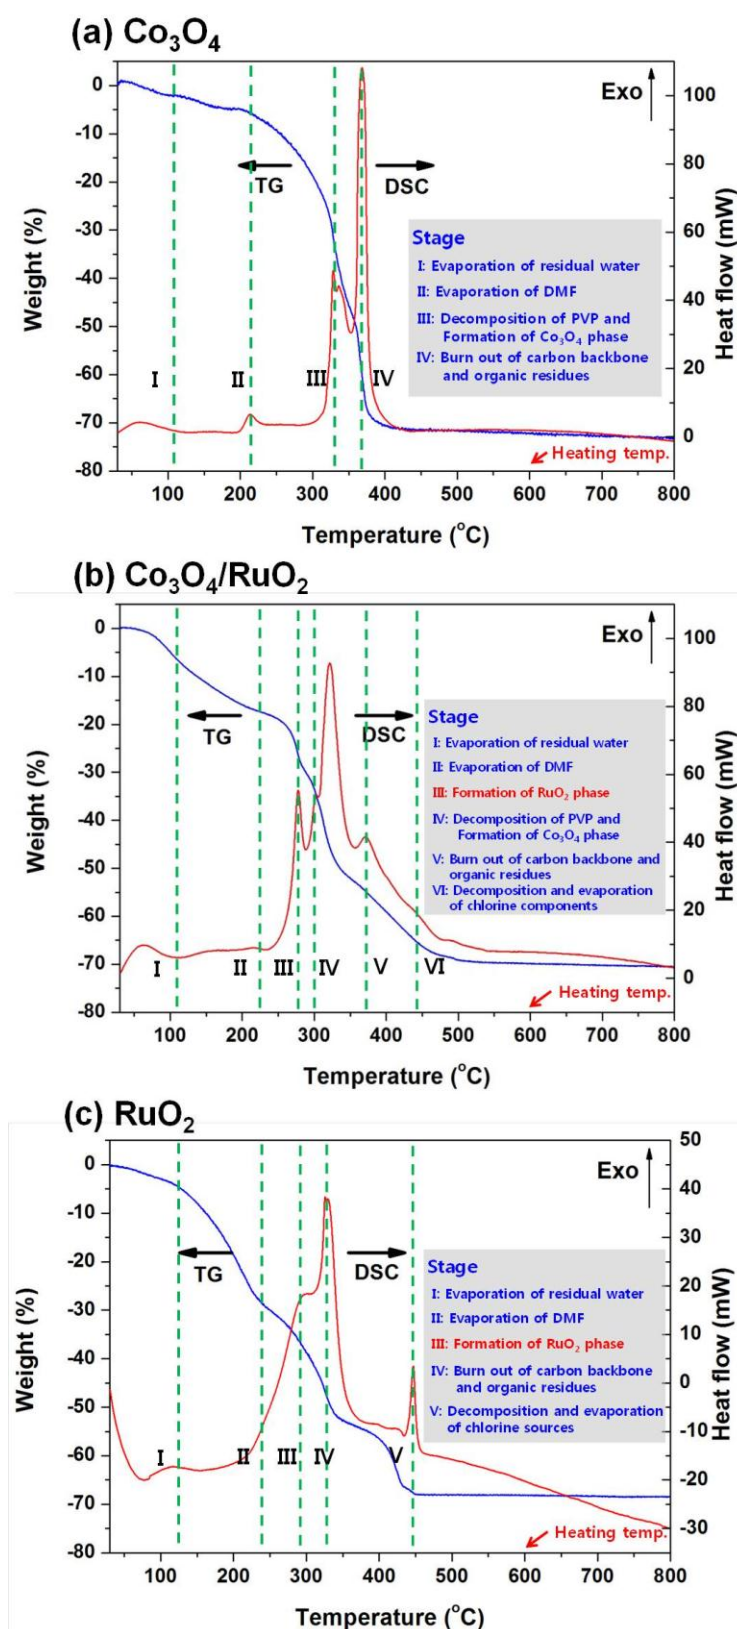

**Fig. S6** Thermogravimetric analysis (TGA) and differential scanning calorimetry (DSC) curves of (a) cobalt acetate precursor/PVP fibers and (b) cobalt acetate and ruthenium chloride precursor/PVP composite fibers. (c) ruthenium chloride precursor/PVP fibers.

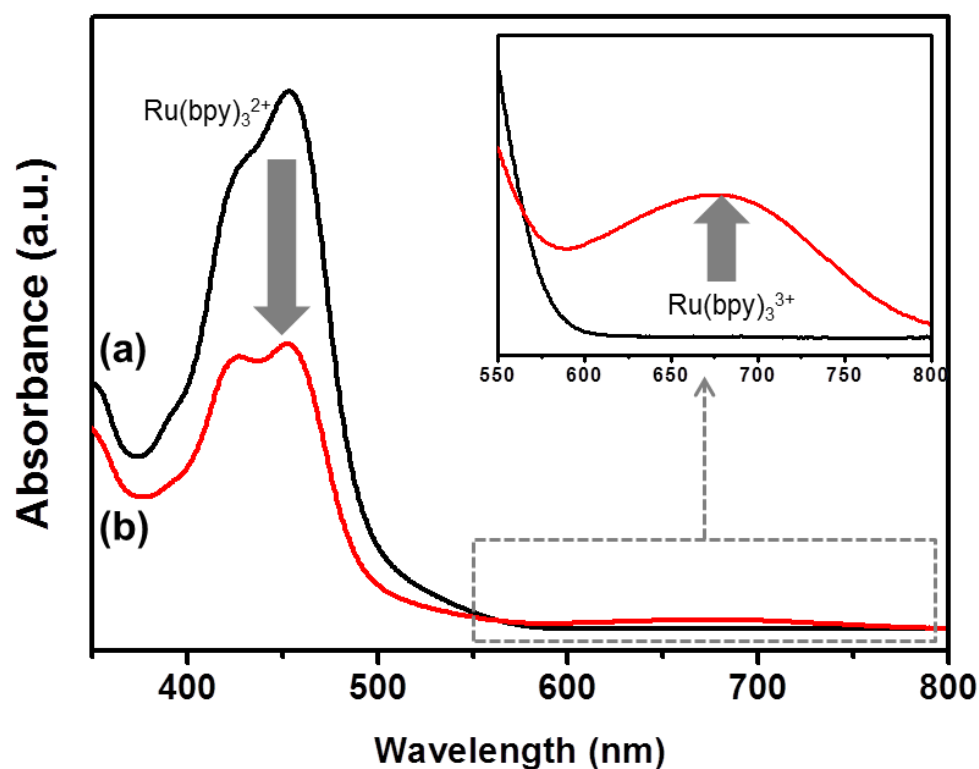

**Fig. S7** The absorbance spectra of [Ru(bpy)<sub>3</sub>]Cl<sub>2</sub>·6H<sub>2</sub>O solution (1 mM) containing Na<sub>2</sub>S<sub>2</sub>O<sub>8</sub> (5 mM) in an 80 mM NaB (pH 8.0) buffer (a) before and (b) after visible light irradiation (> 420 nm). The absorption peaks at approximately 460 nm and 670 nm correspond to Ru(bpy)<sub>3</sub><sup>2+</sup> and Ru(bpy)<sub>3</sub><sup>3+</sup>, respectively. After visible light irradiation, the absorption peak corresponding to Ru(bpy)<sub>3</sub><sup>3+</sup> increased because of photo-induced oxidation of Ru(bpy)<sub>3</sub><sup>2+</sup> whereas the absorption peak of Ru(bpy)<sub>3</sub><sup>2+</sup> decreased.
